# Supplementary material
Source: publisher site journal article supplement (http://static.cambridge.org/content/id/urn:cambridge.org:id:article:S001675681800078X/resource/name/S001675681800078Xsupp002.xlsx)
Supplement: Supplementary file 1 [file S001675681800078Xsupp002.xlsx]

## Sheet: Table S1
Geological Magazine,Modelling the partial melting of meta-sediments in low pressure regional contact aureole: the effect of water and whole rock composition,Wei-(RZ) Wang, Geoffrey Clarke, Nathan R. Daczko, Yue Zhao,Supplementary Material.
Supplementary Table S2.									wt%
ST1123A1pe		SiO2	Al2O3	CaO	MgO	FeO	Na2O	K2O	MgO+FeO
total H2O=3.2 mol.% (free H2O=0)
700°C	3.5 kbar	77.4523	13.223	0.250957	0.0129593	0.0857049	3.17019	5.80486	0.0986642
750°C	3.6 kbar	76.8573	13.4798	0.403288	0.028938	0.328524	2.49628	6.40589	0.357462
800°C	3.75 kbar	75.8811	14.089	0.523192	0.0467231	0.535909	2.24077	6.68321	0.582632
total H2O=4.2 mol.% (free H2O=1 mol.%)									0
700°C	3.5 kbar	77.493	13.1893	0.26024	0.0127625	0.0834532	3.10519	5.85607	0.0962157
750°C	3.6 kbar	76.1664	13.8802	0.422288	0.0312919	0.353438	2.56397	6.58241	0.38473
800°C	3.75 kbar	74.6591	14.8467	0.554929	0.0509764	0.532335	2.38391	6.97201	0.583311
1107spe		SiO2	Al2O3	CaO	MgO	FeO	Na2O	K2O	MgO+FeO
total H2O=2.2 mol.% (free H2O=0)									0
700°C	3.5 kbar	77.7444	12.986	0.314197	0.011668	0.0715123	2.71346	6.15877	0.0831803
750°C	3.6 kbar	77.23	13.2321	0.490651	0.0242747	0.225145	1.93637	6.86152	0.249419
800°C	3.75 kbar	76.3844	13.798	0.622305	0.0382373	0.359957	1.66416	7.13295	0.398195
total H2O=3.2 mol.% (free H2O=1 mol.%)									0
700°C	3.5 kbar	77.8474	12.9002	0.334747	0.0112692	0.0674366	2.56134	6.27756	0.0787057
750°C	3.6 kbar	77.3214	13.1526	0.513384	0.0239438	0.22142	1.78674	6.98056	0.245364
800°C	3.75 kbar	76.4496	13.741	0.647096	0.037611	0.352218	1.52679	7.24573	0.389829
1107ps		SiO2	Al2O3	CaO	MgO	FeO	Na2O	K2O	MgO+FeO
total H2O=2.7 mol.% (free H2O=0)									0
700°C	3.5 kbar	77.278	13.3641	0.205938	0.0139417	0.0974438	3.47889	5.56164	0.111385
750°C	3.6 kbar	76.8731	13.2444	0.375107	0.0485279	0.474812	2.69776	6.2863	0.52334
800°C	3.75 kbar	75.9744	12.8464	0.494914	0.185671	1.58537	2.13964	6.77359	1.77104
total H2O=3.7 mol.% (free H2O=1 mol.%)									0
700°C	3.5 kbar	77.3411	13.3123	0.224105	0.0135412	0.0925208	3.35664	5.65988	0.106062
750°C	3.6 kbar	76.9863	13.1696	0.403992	0.0461497	0.446398	2.51212	6.43551	0.492547
800°C	3.75 kbar	76.1012	12.7718	0.477768	0.176984	1.55783	1.99268	6.92183	1.73482
ST1120Bps		SiO2	Al2O3	CaO	MgO	FeO	Na2O	K2O	MgO+FeO
total H2O=1.81 mol.% (free H2O=0)									0
700°C	3.5 kbar	77.2726	13.368	0.204211	0.0138606	0.0963412	3.49087	5.55406	0.110202
750°C	3.6 kbar	76.6236	13.3995	0.291249	0.0579304	0.534921	3.22855	5.86424	0.592852
800°C	3.75 kbar	75.4904	13.0858	0.396109	0.231934	1.79379	2.91514	6.08683	2.02572
total H2O=2.81 mol.% (free H2O=1 mol.%)									0
700°C	3.5 kbar	77.3031	13.3448	0.213214	0.0136568	0.0938246	3.43013	5.6013	0.107481
750°C	3.6 kbar	76.6779	13.3657	0.304952	0.0566261	0.516391	3.14497	5.93347	0.573017
800°C	3.75 kbar	75.5468	13.0612	0.41386	0.225721	1.76424	2.81748	6.17074	1.98996
